# Supplementary material for: Direct Metagenomic Detection of Viral Pathogens in Nasal and Fecal Specimens Using an Unbiased High-Throughput Sequencing Approach
Source: PubMed Central journal article supplement (PMC2625441; doi:10.1371/journal.pone.0004219), 2009-01-19

Figure S1.

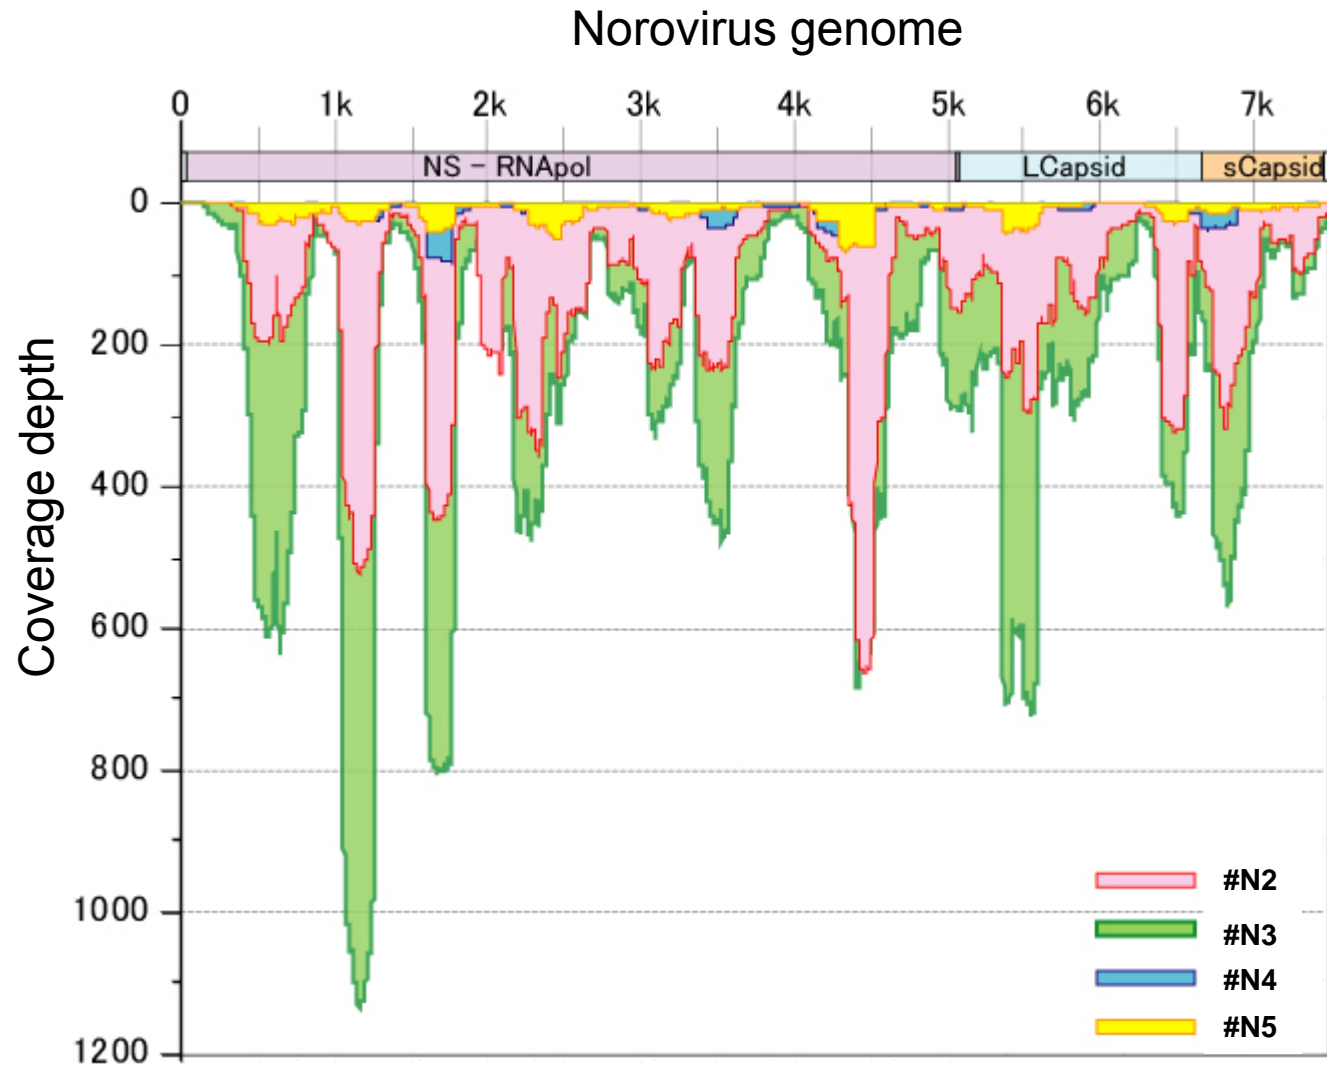

Supplement: pone.0004219.s001.pdf [file pone.0004219.s001.pdf]
