# Supplementary material for: Direct Metagenomic Detection of Viral Pathogens in Nasal and Fecal Specimens Using an Unbiased High-Throughput Sequencing Approach
Source: PubMed Central journal article supplement (PMC2625441; doi:10.1371/journal.pone.0004219), 2009-01-19
Supplement: pone.0004219.s002.pdf [file pone.0004219.s002.pdf]

Table S1. Summary of the best hits for each query sequences (E-value < 10<sup>-40</sup>) in nasopharyngeal aspirates

| #F1  |                                                       |      |                                                 |
|------|-------------------------------------------------------|------|-------------------------------------------------|
| Read | Virus                                                 | Read | Virus                                           |
| 55   | Influenza A virus (A/Texas/UR06-0566/2007(H3N2))      | 2    | Influenza A virus (A/New York/283/1999(H3N2))   |
| 52   | Influenza A virus (A/Kentucky/UR06-0370/2007(H3N2))   | 2    | Influenza A virus (A/New York/238/2005(H3N2))   |
| 43   | Influenza A virus (A/Western Australia/69/2005(H3N2)) | 2    | Influenza A virus (A/New York/214/2003(H3N2))   |
| 39   | Influenza A virus (A/Canterbury/26/2005(H3N2))        | 2    | Influenza A virus (A/Miyagi/S707/2006(H3N2))    |
| 31   | Influenza A virus (A/Canterbury/205/2005(H3N2))       | 2    | Influenza A virus (A/Miyagi/N1220/2005(H3N2))   |
| 29   | Influenza A virus (A/New York/938/2006(H3N2))         | 2    | Influenza A virus (A/Memphis/5/1988(H3N2))      |
| 26   | Influenza A virus (A/Virginia/UR06-0580/2007(H3N2))   | 2    | Influenza A virus (A/Canterbury/127/2005(H3N2)) |
| 11   | Influenza A virus (A/South Australia/42/2005(H3N2))   | 2    | Influenza A virus (A/California/8/2006(H3N2))   |
| 10   | Influenza A virus (A/Virginia/UR06-0021/2006(H3N2))   |      |                                                 |
| 10   | Influenza A virus (A/Queensland/52/2005(H3N2))        |      |                                                 |
| 10   | Influenza A virus (A/Aichi/122/2006(H3N2))            |      |                                                 |
| 8    | Influenza A virus (A/Oregon/UR06-0389/2007(H3N2))     |      |                                                 |
| 7    | Influenza A virus (A/TW/875/04(H3N2))                 |      |                                                 |
| 7    | Influenza A virus (A/New South Wales/7/1999(H3N2))    |      |                                                 |
| 6    | Influenza A virus (A/Washington/UR06-0252/2007(H3N2)) |      |                                                 |
| 6    | Influenza A virus (A/Washington/UR06-0225/2007(H3N2)) |      |                                                 |
| 6    | Influenza A virus (A/Sachsen-Anhalt/19/99(H3N2))      |      |                                                 |
| 6    | Influenza A virus (A/New York/923/2006(H3N2))         |      |                                                 |
| 6    | Influenza A virus (A/Miyagi/S736/2006(H3N2))          |      |                                                 |
| 5    | Influenza A virus (A/USA/AF1086/2007(H3N2))           |      |                                                 |
| 5    | Influenza A virus (A/New York/UR06-0515/2007(H3N2))   |      |                                                 |
| 5    | Influenza A virus (A/New York/928/2006(H3N2))         |      |                                                 |
| 5    | Influenza A virus (A/Aichi/82/2006(H3N2))             |      |                                                 |
| 4    | Influenza A virus (A/Oregon/UR06-0200/2007(H3N2))     |      |                                                 |
| 4    | Influenza A virus (A/Canterbury/258/2005(H3N2))       |      |                                                 |
| 3    | Influenza A virus (A/El Salvador/AF1042/2006(H3N2))   |      |                                                 |
| 2    | Influenza A virus (A/New York/933/2006(H3N2))         |      |                                                 |
| 2    | Influenza A virus (A/New York/608/1996(H3N2))         |      |                                                 |
| 2    | Influenza A virus (A/New York/485/2003(H3N2))         |      |                                                 |
| 2    | Influenza A virus (A/New York/377/2004(H3N2))         |      |                                                 |
| 2    | Influenza A virus (A/New York/365/2004(H3N2))         |      |                                                 |

Table S1. Summary of the best hits for each query sequences (E-value < 10<sup>-40</sup>) in nasopharyngeal aspirates (continue)

| #F2  |                                                     | #F3      |                                                       |
|------|-----------------------------------------------------|----------|-------------------------------------------------------|
| Read | Virus                                               | Read     | Virus                                                 |
| 12   | Influenza A virus (A/Waikato/13/2005(H1N1))         | 20       | Influenza A virus (A/Thailand/426/2005(H3))           |
| 3    | Influenza A virus (A/Virginia/UR06-0295/2007(H1N1)) | 12       | Influenza A virus (A/Canterbury/16/2005(H3N2))        |
|      |                                                     | 11       | Influenza A virus (A/South Australia/20/2005(H3N2))   |
|      |                                                     | 10       | Influenza A virus (A/Kentucky/UR06-0370/2007(H3N2))   |
|      |                                                     | <b>7</b> | <b>WU Polyomavirus</b>                                |
|      |                                                     | 7        | Influenza A virus (A/New York/908/2004(H3N2))         |
|      |                                                     | 5        | Influenza A virus (A/Wellington/4/2005(H3N2))         |
|      |                                                     | 5        | Influenza A virus (A/Waikato/12/2005(H3N2))           |
|      |                                                     | 4        | Influenza A virus (A/Egypt/96/2002(H1N2))             |
|      |                                                     | 4        | Influenza A virus (A/Christchurch/10/2004(H3N2))      |
|      |                                                     | 3        | Influenza A virus (A/New York/913/2005(H3N2))         |
|      |                                                     | 2        | Influenza A virus (A/Western Australia/65/2005(H3N2)) |
|      |                                                     | 2        | Influenza A virus (A/Waikato/1/2004(H3N2))            |
|      |                                                     | 2        | Influenza A virus (A/Canterbury/127/2005(H3N2))       |
|      |                                                     | 2        | Influenza A virus (A/Brisbane/1/2006(H3))             |
