# Supplementary material for: Direct Metagenomic Detection of Viral Pathogens in Nasal and Fecal Specimens Using an Unbiased High-Throughput Sequencing Approach
Source: PubMed Central journal article supplement (PMC2625441; doi:10.1371/journal.pone.0004219), 2009-01-19
Supplement: pone.0004219.s003.pdf [file pone.0004219.s003.pdf]

Table S2. Summary of the best hits for each query sequences (E-value < 10<sup>-40</sup>) in fecal samples

| #N1  |                                     | #N2   |                                                   |
|------|-------------------------------------|-------|---------------------------------------------------|
| Read | Virus                               | Read  | Virus                                             |
| 5    | Norovirus Hu/Houston/TCH186/2002/US | 1,707 | Norovirus Hu/Houston/TCH186/2002/US               |
|      |                                     | 1,646 | Norovirus Hu/GII.4/Kobe034/2006/JP                |
|      |                                     | 1,422 | Norovirus genogroup 2                             |
|      |                                     | 853   | Norovirus Hu/NLV/Oxford/B4S6/2002/UK              |
|      |                                     | 328   | Norovirus Hu/GII.4/Nijmegen115/2006/NL            |
|      |                                     | 235   | Norovirus Hu/NLV/Oxford/B2S16/2002/UK             |
|      |                                     | 233   | Norovirus Hu/GII.4/Nijmegen/2007/NL               |
|      |                                     | 210   | Norovirus Hu/Norovirus/GII-4/Pecs2967/2007/HUN    |
|      |                                     | 193   | Norovirus Hu/GII-4/Narashino/061281/2006/JP       |
|      |                                     | 111   | Norovirus Hu/NLV/Oxford/B1S12/2002/UK             |
|      |                                     | 93    | Norovirus Hu/GGII.4/5357A/67071/2006/NLD          |
|      |                                     | 62    | Norwalk virus                                     |
|      |                                     | 56    | Norovirus Hu/NLV/Dresden174/pUS-NorII/1997/GE     |
|      |                                     | 39    | Norovirus Hu/NLV/Oxford/B8S5/2002/UK              |
|      |                                     | 16    | Norovirus Env/GGII.4/671/2006/IT                  |
|      |                                     | 12    | Norovirus Hu/GII.4/MD-2004/2004/US                |
|      |                                     | 11    | Norovirus Hu/GII-4/Katori/061492/2006/JP          |
|      |                                     | 10    | Norovirus Hu/GII-4/Kashiwa/061256/2006/JP         |
|      |                                     | 9     | Norovirus Hu/Sakai/04-179/2005/JP                 |
|      |                                     | 9     | Norovirus Hu/GII.4/Miyagi/8/2007/JP               |
|      |                                     | 8     | Norovirus Hu/GII.4/DenHaag89/2006/NL              |
|      |                                     | 7     | Human calicivirus NLV/GII/Langen1061/2002/DE      |
|      |                                     | 6     | Norovirus Hu/Norovirus/GII-4/Kapvar3029/2007/HUN  |
|      |                                     | 6     | Norovirus Hu/GGII.4/0029B/69787/2006/NLD          |
|      |                                     | 3     | Norwalk-like virus                                |
|      |                                     | 2     | Norovirus Hu/NLV/Oxford/B4S7/2002/UK              |
|      |                                     | 2     | Norovirus Hu/GGII.4/OM2/2002/DNK                  |
|      |                                     | 2     | Norovirus Hu/GGII.4/5357B/67071/2006/NLD          |
|      |                                     | 2     | Norovirus Hu/GGII-4/Benidorm/1707/06/Sp           |
|      |                                     | 2     | Norovirus Env/GGII.4/680/2006/IT                  |
|      |                                     | 2     | Human calicivirus NV/GII/Stockholm/IV6211/2002/SE |

Table S2. Summary of the best hits for each query sequences (E-value < 10<sup>-40</sup>) in fecal samples (continue)

|            |                                                           | #N3      |                                                    |
|------------|-----------------------------------------------------------|----------|----------------------------------------------------|
| Read       | Virus                                                     | Read     | Virus                                              |
| <b>813</b> | <b>Kyuri green mottle mosaic virus</b>                    | <b>7</b> | <b>Citrus tristeza virus</b>                       |
| 759        | Norovirus Hu/GGII.4/5357A/67071/2006/NLD                  | 6        | Norovirus Hu/GII.4/Miyagi/8/2007/JP                |
| 583        | Norovirus Hu/NLV/Oxford/B2S16/2002/UK                     | 6        | Norovirus Hu/GII.4/Miyagi/18/2006/JP               |
| 267        | Norovirus Hu/Norovirus/GII-4/Pecs2967/2007/HUN            | 6        | Norovirus Hu/Fujian/49747/2006/CHN                 |
| 231        | Norovirus Hu/Norovirus/GII-4/Mosonmagyarovar2594/2006/HUN | 5        | Norovirus Hu/GII.4/DenHaag89/2006/NL               |
| 130        | Norovirus Hu/NLV/Oxford/B1S12/2002/UK                     | 4        | Norovirus Hu/GII/410/JPN                           |
| 125        | Norwalk virus                                             | 3        | Norwalk-like virus NLV/Burwash Landing/331/1995/US |
| 120        | Norovirus Hu/NLV/Dresden174/pUS-NorII/1997/GE             | 3        | Norovirus Hu/GII-4/C5-159/South Korea              |
| 116        | Norovirus Hu/GII.4/Nijmegen/2007/NL                       | 3        | Human calicivirus Hu/NLV/GII/MD145-12/1987/US      |
| 96         | Norovirus Hu/Norovirus/GII-4/Kapuvár3029/2007/HUN         | <b>3</b> | <b>Enterobacteria phage phiK</b>                   |
| 61         | Norwalk-like virus                                        | 2        | Norovirus NVA3                                     |
| 50         | Norovirus Hu/GGII.4/OM2/2002/DNK                          | 2        | Norovirus Hu/GII-4/Inba/061367/2006/JP             |
| 43         | Norovirus Env/GGII/670/2006/IT                            | 2        | Norovirus Hu/GGII-4/Alzira/1695/06/Sp              |
| 39         | Norovirus Hu/Sakai/04-179/2005/JP                         | 2        | Norovirus Hu/5095/2001/Bra                         |
| 31         | Norovirus Hu/GII-4/Kaiso/060848/2006/JP                   | 2        | Norovirus Env/GGII.4/704/2006/IT                   |
| 30         | Norovirus Hu/GII.4/MD-2004/2004/US                        | 2        | Human calicivirus NV/GII/Stockholm/IV3355/2002/SE  |
| 20         | Norovirus Hu/GII.4/Kobe034/2006/JP                        |          |                                                    |
| 20         | Norovirus Hu/GII-4/Kashiwa/061256/2006/JP                 |          |                                                    |
| 20         | Norovirus Hu/Ehime/05-30/2005/JP                          |          |                                                    |
| 19         | Human calicivirus NLV/GII/Langen1061/2002/DE              |          |                                                    |
| 17         | Norovirus Hu/GII-4/Narashino/061281/2006/JP               |          |                                                    |
| 17         | Human norovirus Saitama                                   |          |                                                    |
| 13         | Norovirus Hu/NLV/Oxford/B4S7/2002/UK                      |          |                                                    |
| 12         | Norovirus isolates                                        |          |                                                    |
| 12         | Norovirus Hu/GII.4/Miyagi/5/2006/JP                       |          |                                                    |
| 11         | Norovirus Env/GGII.4/671/2006/IT                          |          |                                                    |
| 10         | Norovirus Hu/Guangzhou/NV-VP2/2006/China                  |          |                                                    |
| 10         | Human calicivirus NV/GII/Stockholm/IV6211/2002/SE         |          |                                                    |
| 9          | Norovirus Hu/Jilin/50156/2006/CHN                         |          |                                                    |

Table S2. Summary of the best hits for each query sequences (E-value < 10<sup>-40</sup>) in fecal samples (continue)

| #N4       |                                               | #N5        |                                             |
|-----------|-----------------------------------------------|------------|---------------------------------------------|
| Read      | Virus                                         | Read       | Virus                                       |
| 106       | Norovirus Hu/NLV/Oxford/B2S16/2002/UK         | <b>762</b> | <b>Pepper mild mottle virus</b>             |
| 57        | Norovirus Hu/GII.4/Hunter 532D/04O/AU         | 188        | Norovirus Hu/Chiba/04-1050/2005/JP          |
| 50        | Norovirus Hu/GII-4/Sanbu/050878/2006/JP       | 151        | Norovirus Hu/Ehime/05-30/2005/JP            |
| 49        | Norovirus Hu/GGII.4/7366B/63808/NLD           | 59         | Norovirus Hu/GII-4/Funabashi/050601/2005/JP |
| 45        | Norovirus Hu/Houston/TCH186/2002/US           | 50         | Norovirus Hu/GII/Shandong/TT147/China       |
| 43        | Norovirus genogroup 2                         | 38         | Norovirus Hu/Sakai/04-179/2005/JP           |
| 39        | Norovirus Hu/NLV/Oxford/B4S6/2002/UK          | 34         | Norovirus Hu/Guangzhou/NVgz01/CHN           |
| 17        | Norovirus Hu/NLV/Dresden174/pUS-NorII/1997/GE | 27         | Norovirus Hu/GII-4/Chiba/040974/2004/JP     |
| 14        | Norovirus Hu/Chiba/04-899/2004/JP             | 23         | Norovirus Hu/Beijing/CR2905/2004/CHN        |
| <b>14</b> | <b>Human coronavirus HKU1</b>                 | 20         | Norovirus Hu/Guangzhou/NV-VP2/2006/China    |
| 11        | Norovirus Hu/GII.4/2004/NL                    | <b>17</b>  | <b>Crucifer tobamovirus</b>                 |
| 9         | Norovirus Hu/NV/Hokkaido/322/2005/JP          | 6          | Norovirus Hu/CHN43172/CC05                  |
| 7         | Norovirus Hu/GII-4/Kimitsu/041440/2005/JP     | 5          | Norovirus Hu/NV/Hokkaido/306/2005/JP        |
| 6         | Norovirus Hu/NLV/Oxford/B2S11/2002/UK         | 5          | Norovirus Hu/GII-4/Kimitsu/061146/2006/JP   |
| 5         | Norovirus Hu/Sakai/04-179/2005/JP             | 2          | Norovirus Hu/CHN44898/KM04                  |
| 4         | Norwalk virus                                 | <b>2</b>   | <b>Tobacco mosaic virus</b>                 |
| 4         | Norovirus isolates                            |            |                                             |
| 4         | Norovirus Hu/Osaka/110/05/JP                  |            |                                             |
| 4         | Norovirus Hu/GGII.4/Liempde048/2004/NL        |            |                                             |
| 3         | Norovirus Hu/GGII.4/Nijmegen083/2004/NL       |            |                                             |
| <b>3</b>  | <b>Phage phiV10</b>                           |            |                                             |
| <b>3</b>  | <b>Human endogenous retrovirus K</b>          |            |                                             |
