# Supplementary material for: Direct Metagenomic Detection of Viral Pathogens in Nasal and Fecal Specimens Using an Unbiased High-Throughput Sequencing Approach
Source: PubMed Central journal article supplement (PMC2625441; doi:10.1371/journal.pone.0004219), 2009-01-19
Supplement: pone.0004219.s004.pdf [file pone.0004219.s004.pdf]

Table S3. Bias towards TG(CA)-enrichment within the detected norovirus sequences in fecal samples

| depth | over 200 |                      | below 100 |                      |
|-------|----------|----------------------|-----------|----------------------|
| Rank  | Pattern  | Z-value <sup>a</sup> | Pattern   | Z-value <sup>a</sup> |
| 1     | TG       | 6.7                  | CT        | 3.4                  |
| 2     | CA       | 5.3                  | AG        | 3.1                  |
| 3     | GG       | 2.6                  | TG        | 2.2                  |
| 4     | CT       | 2.1                  | CA        | 1.8                  |
| 5     | CC       | 2.0                  | TC        | 1.5                  |

a: The Z-value was calculated using the formulae (1-3), where  $Z_i$  is the Z-value of the pattern of two nucleotides  $i$ ,  $x_{io}$  is the observed number of the pattern  $i$ ,  $\langle x_i \rangle$  is the average number of the pattern  $i$  in random sample,  $v_i$  is its variance,  $n$  is the number of shuffle trials 100,000,  $x_{ij}$  is the number of the pattern  $i$  at trial  $j$ .

$$(1) Z_i = (x_{io} - \langle x_i \rangle) / \sqrt{v_i}$$

$$(2) \langle x_i \rangle = \frac{1}{n} \sum_{j=1}^n x_{ij}$$

$$(3) v_i = \frac{n \sum_{j=1}^n x_{ij}^2 - \left( \sum_{j=1}^n x_{ij} \right)^2}{n(n-1)}$$
